# Supplementary material for: Effect of cluster set resistance training combined with high-intensity interval training on cardiorespiratory and muscular fitness in untrained young men
Source: PeerJ. 2025 Dec 19;13:e20492. doi: 10.7717/peerj.20492 (PMC12721101; doi:10.7717/peerj.20492)
Supplement: Supplemental Information 1 [file peerj-13-20492-s001.xlsx]

## Sheet: vo2max
	Pre	12week
A	43.6	49
A	52	56.8
A	50.3	52.6
A	46.5	58.5
A	35.8	44.5
A	47.4	50.3
A	48.4	52.52
A	45	54.7
A	46.6	52.5
A	42.7	53.8
A	42.9	52.5
C	44.6	45.7
C	41.4	50.9
C	51.3	61.7
C	54.3	51.7
C	46.1	51.65
C	33	46.3
C	51.8	59.4
C	49.5	49.6
C	42.7	56.4
C	44.3	53.5

## Sheet: Regional Muscle thickness
	Biceps brachii		Pectoralis major		Rectus femoris
	Pre	12Week	Pre	12Week	Pre	12Week
A	1.66	2.46333	2.1	2.55	1.69	2.52
A	1.51	1.80667	1.12	1.63	1.84	2.21333
A	1.8	2.01667	1.14	1.7	1.91	2.51667
A	1.51	1.65333	1.4	1.56	1.96	2.14
A	1.5	1.816	1.69	1.54	2.01	2.14667
A	1.24	1.48	1.01	1.52	2.13	2.18
A	1.95	2.68667	1.43	2.2	1.71	2.34
A	1.65	2.03	1.87	2.89	1.96	2.40667
C	2.1	2.55	1.21	2.24	1.77	2.35333
C	1.12	1.63	1.19	1.63	1.76	2.58333
C	1.14	1.7	1.48	1.64	2.3	2.41
C	1.4	1.56	1.44	2.01	1.97	2.26667
C	1.69	1.54	1.58	2.02	2.28	2.43
C	1.01	1.52	1.27	1.68	1.59	2.32
C	1.43	2.2	1.52	2.5	2.34	2.67667
C	1.87	2.89	1.25	1.68	2.09	2.41

## Sheet: 1RM
	Squat		Bench		Deadift		Rowing
	PRE	12Week	PRE	12Week	PRE	12Week	PRE	12Week
A	100	170	80	100	130	160	60	90
A	100	160	80	95	100	140	100	100
A	60	102.5	30	45	55	85	50	72.5
A	130	160	80	85	130	150	60	92
A	120	150	65	85	115	135	77	95
A	140	175	70	90	122	160	77	95
A	160	180	100	112.5	160	190	90	110
A	140	175	70	90	160	165	60	100
A	80	125	30	50	100	120	57	74.5
A	150	190	70	80	135	150	60	80
A	65	110	35	55	104	140	60	80
C	130	170	50	75	110	145	80	90
C	110	150	60	80	90	150	70	87
C	100	155	50	70	100	155	60	90
C	130	205	90	110	130	170	70	110
C	150	180	85	90	145	190	80	110
C	90	140	70	90	110	130	40	75
C	125	150	85	90	132	155	80	115
C	115	155	70	85	140	160	77	95
C	110	170	75	80	105	143	77	100
C	80	130	35	60	80	135	55	95
C	85	140	50	65	85	95	70	90

## Sheet: Standing long jump
Group	Pre	12week
A	268	274
A	240	264
A	197	195
A	265	270
A	246	258
A	251	264
A	190	216
A	213	221
A	237	248
A	231	242
A	233	247
C	290	291
C	261	280
C	240	245
C	249	274
C	235	245
C	263	264
C	195	218
C	240	274
C	251	258
C	256	260
C	294	303

## Sheet: Muscular endurance
	Squat		Bench		Deadift		Rowing
	PRE	12Week	PRE	12Week	PRE	12Week	PRE	12Week
A	1120	1547	560	560	910	1680	504	945
A	700	1792	672	864.5	840	1274	700	1400
A	504	1435	105	315	308	595	315	710.5
A	910	1680	840	892.5	1092	2100	840	966
A	504	1050	455	595	483	945	431.2	798
A	784	1225	490	630	1281	896	431.2	665
A	1232	2646	1050	1181.25	882	2128	1260	1540
A	1470	3062.5	392	504	896	1732.5	630	1050
A	896	1837.5	294	385	770	840	438.9	1043
A	1260	1862	980	896	1606.5	1260	630	1120
A	637	1155	245	385	509.6	980	378	672
C	1092	1785	595	630	1155	1827	784	945
C	1540	1260	672	448	1008	840	392	669.9
C	1050	1627.5	315	490	840	1085	672	756
C	728	1722	945	1232	1092	1428	980	1155
C	1680	1890	892.5	882	1522.5	1596	1232	1232
C	756	1078	490	756	770	1092	280	787.5
C	1312.5	1050	773.5	630	924	1085	952	805
C	805	1519	490	892.5	980	1120	539	798
C	770	1785	787.5	728	1102.5	1001	431.2	700
C	504	1547	245	504	504	945	500.5	798
C	595	2450	350	682.5	714	997.5	588	945
